# Supplementary material for: Participation of ventricular trabeculae in neonatal cardiac regeneration leads to ectopic recruitment of Purkinje-like cells
Source: Research Square preprint supplement (doi:10.21203/rs.3.rs-3615267/v1), 2023-11-28

Damaged myocardium

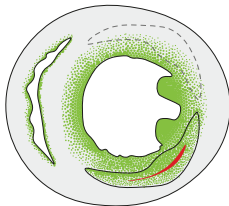

CM renewal

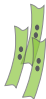

Increased lineage plasticity

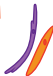

Incomplete maturation

*Nkx2-5*

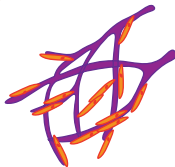

Border zone  
initially undamaged PF network

Immature trabecular signature  
Sustained proliferation

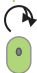

Supplement: Supplementary file 1 [file fabf790ca435d16ea0a52c6b.pdf]
